# Supplementary material
Source: PubMed Central journal article supplement (PMC6249571)
Supplement: jiy472_suppl_supplementary-material.pdf [file jiy472_suppl_supplementary-material.pdf]

**Ebola Virus VP40 Modulates Cell Cycle and Biogenesis of Extracellular Vesicles**

**Michelle L. Pleet, James Erickson, Catherine DeMarino, Robert A. Barclay, Maria Cowen, Benjamin Lepene, Janie Liang, Jens H. Kuhn, Laura I. Prugar, Spencer W. Stonier, John M. Dye, Weidong Zhou, Lance A. Liotta, M. Javad Aman, Fatah Kashanchi**

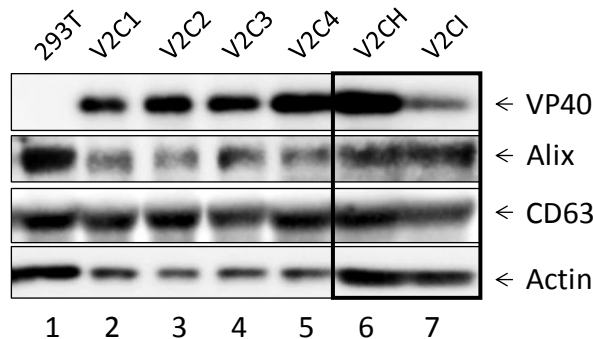

**Supplementary Figure 1: Generation of stable VP40-producing cell lines.** 293T cells were transfected with 20 µg of CMV-VP40 plasmid with antibiotic selection marker (pcDNA3.1/Hygro) by electroporation. Cells were treated next day with hygromycin B for plasmid selection (200-400 µg/mL). To generate VP40 clones, transfected cells were cultured for > 3 wk, followed by isolation of surviving colonies and multiple passages under specific antibiotic selection. Several of the resulting clones (V2C1-4, V2CH and V2CI) and control 293T cells were cultured for 5 days in exosome-free media, followed by harvesting and filtering (0.22 µm) of the supernatant. One milliliter of each supernatant was incubated with 30 µL NT80/82 particles for 72 h at 4°C. NT pellets were washed once in 1x PBS, followed by resuspension in

20 12  $\mu$ L Laemmli buffer and loading onto a 4-20% Tris-glycine gel, and subsequent western blot  
21 analysis for VP40, exosomal markers Alix and CD63, and Actin protein levels. V2C cells chosen  
22 for future experiments (V2CH and V2CI) are enclosed by a black box.

23

24

25

26

27

28

29

30

31

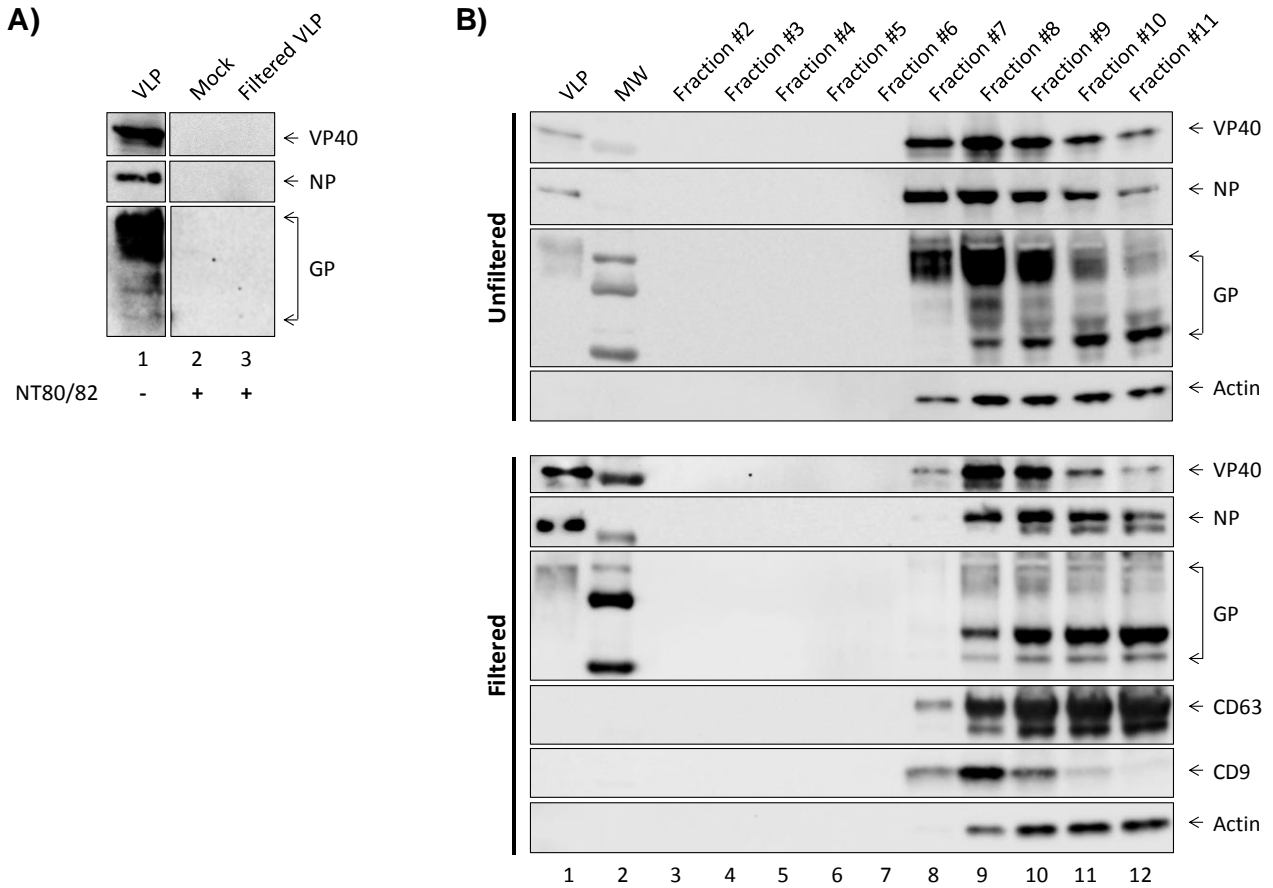

32

33

34 **Supplementary Figure 2: Effect of filtration on VLP.** A) Five micrograms of VLPs were  
 35 added into 1 mL of sterile 1x PBS and filtered (through 0.22  $\mu$ m) alongside 1 mL of 1x PBS  
 36 alone (mock). Filtered samples were incubated with 30  $\mu$ L of NT80/82 particles (30% slurry)  
 37 overnight at 4°C, followed by processing and loading onto a 4-20% Tris-glycine gel, and  
 38 subsequent western blot analysis for VP40, NP, and GP protein levels. Unfiltered VLP (0.25  $\mu$ g)  
 39 was loaded side-by-side with filtered samples. Selected lanes were taken from the same blot with  
 40 identical exposure settings presented in the figure. B) V2CH cells were grown for 5 days in  
 41 exosome-free media, followed by harvesting of supernatants. Supernatants were spiked with 10  
 42  $\mu$ g of VLP and either left unfiltered or filtered (through 0.22  $\mu$ m). VLP-spiked supernatants were  
 43 then incubated with ExoMAX™ (1:1 reagent:supernatant) overnight at 4°C. EVs were pelleted,

44 resuspended in 0.5 mL 1x PBS, and loaded on qEV columns. Fractions #2-11 (0.5 mL each)  
45 were collected and separately incubated with 30  $\mu$ L NT80/82 at 4°C for 24 h. EV-bound NTs  
46 were then processed for western blot analysis of VP40, NP, GP, CD63, CD9, and Actin levels.  
47 VLP (0.25  $\mu$ g) positive control was loaded. MW = molecular weight ladder.

48

49

50

51

52

53

54

55

56

57

58

59

60

61

62

63

64

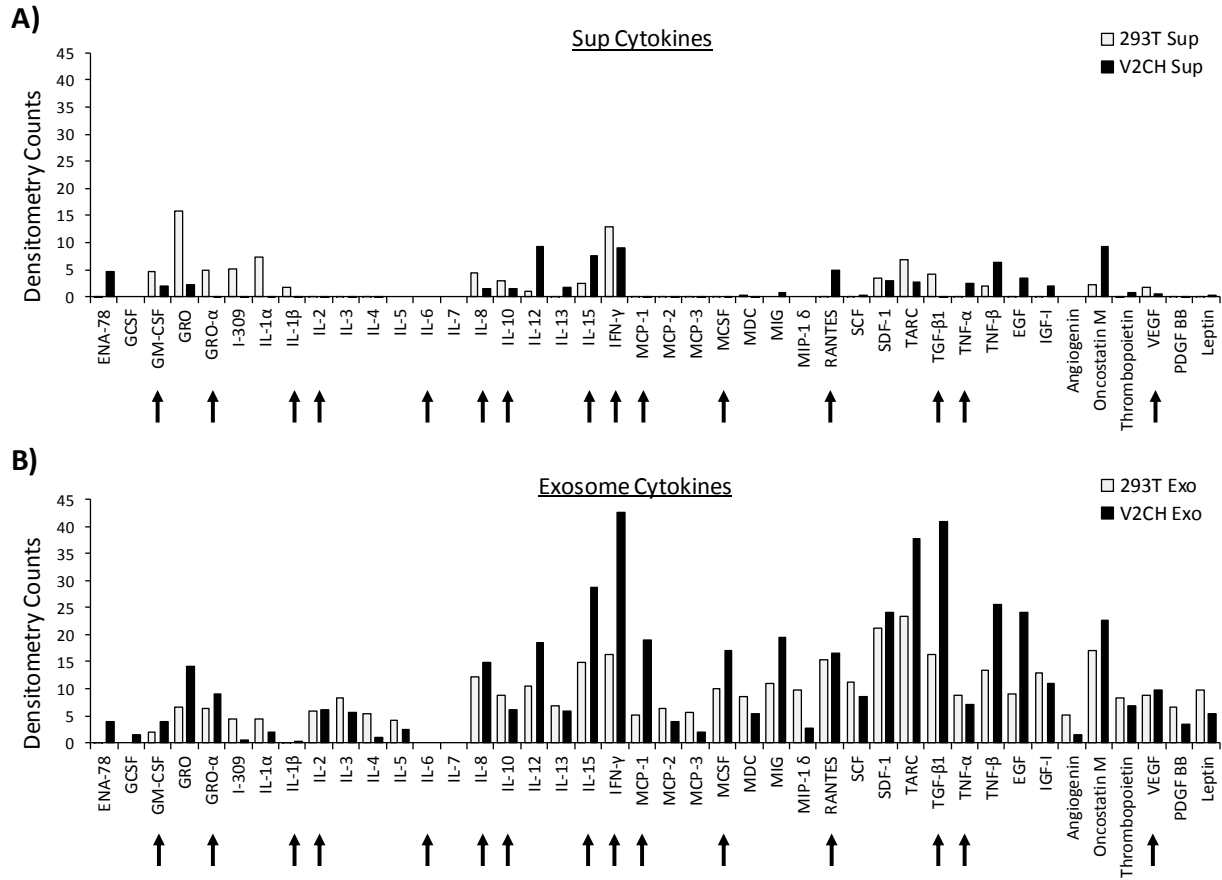

65

66

67 **Supplementary Figure 3: Cytokine profiles of supernatants and exosomes from VP40-**

68 **producing cells.** 293T and V2CH cells were cultured for 5 d in exosome-free media, followed

69 by harvesting of the supernatants, filtering (0.22 μm), and preparation for cytokine array assay.

70 **A)** One milliliter of supernatant (Sup) from each cell type was used alongside 1 mL of filtered

71 (0.22 μm) exosome-free DMEM media for incubation on human cytokine arrays. **B)** An

72 additional 10 mL of supernatant samples from each cell type was incubated with 10 mL

73 ExoMAX™ (1:1 ratio sup:reagent) for EV precipitation overnight at 4°C. The resulting EV

74 pellet was resuspended in 300 μL sterile 1x PBS and loaded onto a 6-18% iodixanol density

75 gradient (1.2% increments). Samples were ultracentrifuged at 100,000 x g for 90 min and

76 fractions 10.8 and 12.0 were harvested and pooled (2 mL total). One milliliter of pooled exosome  
77 fractions were used side-by-side with sup and exosome-free DMEM samples for human cytokine  
78 array analysis. Exposures between membranes were matched according to positive and negative  
79 control signals. Raw densitometry counts for all membranes were obtained and normalized by  
80 subtracting the background signals represented by the negative control on each membrane. The  
81 background resulting from exosome-free DMEM media was subtracted from the signals  
82 produced by 293T and V2CH samples, and positive signals were graphed. Cytokines of  
83 significance for EBOV pathogenesis are indicated by black arrows.

84

85

86

87

88

89

90

91

92

93

94

95

96

97

98 **Supplementary Table 1: Proteins of interest present in EVs from 293T and VP40-**  
99 **producing cells.** 293T, V2CL, and V2CH cells were cultured for 5 days in exosome-free media,  
100 followed by harvesting and filtering (0.22  $\mu\text{m}$ ) of the supernatants. Ten milliliters of filtered  
101 supernatants were incubated with 10 mL ExoMAX<sup>TM</sup> overnight at 4°C. The resulting EV pellet  
102 was resuspended in 300  $\mu\text{L}$  1x PBS and loaded onto a 6-18% iodixanol density gradient (1.2%  
103 fraction increments). Samples were ultracentrifuged for 90 min at 100,000 x g, followed by  
104 collection of the 10.8 and 12.0 exosome fractions (1 mL each). Each fraction was incubated with  
105 30  $\mu\text{L}$  of NT80/82 particles at 4°C for 48 h. Next, NT pellets were washed once with 1x PBS and  
106 processed for mass spectrometry. The data accumulated from the 10.8 and 12.0 fractions for each  
107 cell type were added and compared side-by-side to other cell types. Select proteins belonging to  
108 several categories are shown, along with their score and peptide hit number. Scores and peptide  
109 numbers correspond to summed 10.8 and 12.0 fractions. Cytokine-related proteins of interest  
110 were bolded.  
111

112

| Vesicle-Associated                              |       |            |       |            |       |            |
|-------------------------------------------------|-------|------------|-------|------------|-------|------------|
| Protein                                         | V2CH  |            | V2CL  |            | 293T  |            |
|                                                 | Score | # Peptides | Score | # Peptides | Score | # Peptides |
| heat shock protein HSP 90-beta isoforma         | 57.47 | 14         | 89.75 | 22         | 30.34 | 10         |
| heat shock 70 kDa protein 6                     | 6.70  | 4          | 11.26 | 3          | 8.11  | 3          |
| heat shock cognate 71 kDa protein isoform 2     | 91.55 | 22         | 69.51 | 20         | 43.18 | 13         |
| clathrin heavy chain 2 isoform 1                | 6.78  | 2          | 3.96  | 1          | 0.00  | 0          |
| AP-1 complex subunit beta-1 isoform b           | 6.19  | 2          | 2.90  | 1          | 0.00  | 0          |
| AP-2 complex subunit beta isoform b             | 6.19  | 2          | 2.90  | 1          | 0.00  | 0          |
| stress-induced-phosphoprotein 1 isoform b       | 9.42  | 3          | 7.61  | 2          | 0.00  | 0          |
| vacuolar protein sorting-associated protein 35  | 9.31  | 3          | 3.00  | 1          | 0.00  | 0          |
| clathrin heavy chain 1 isoform 2                | 22.21 | 6          | 3.96  | 1          | 2.63  | 1          |
| coatamer subunit alpha isoform 1                | 19.80 | 6          | 0.00  | 0          | 0.00  | 0          |
| synaptic vesicle membrane protein VAT-1 homolog | 46.64 | 9          | 53.92 | 13         | 30.06 | 6          |

113

| Vesicle-Associated                              |       |            |       |            |       |            |
|-------------------------------------------------|-------|------------|-------|------------|-------|------------|
| Protein                                         | V2CH  |            | V2CL  |            | 293T  |            |
|                                                 | Score | # Peptides | Score | # Peptides | Score | # Peptides |
| heat shock protein HSP 90-beta isoforma         | 57.47 | 14         | 89.75 | 22         | 30.34 | 10         |
| heat shock 70 kDa protein 6                     | 6.70  | 4          | 11.26 | 3          | 8.11  | 3          |
| heat shock cognate 71 kDa protein isoform 2     | 91.55 | 22         | 69.51 | 20         | 43.18 | 13         |
| clathrin heavy chain 2 isoform 1                | 6.78  | 2          | 3.96  | 1          | 0.00  | 0          |
| AP-1 complex subunit beta-1 isoform b           | 6.19  | 2          | 2.90  | 1          | 0.00  | 0          |
| AP-2 complex subunit beta isoform b             | 6.19  | 2          | 2.90  | 1          | 0.00  | 0          |
| stress-induced-phosphoprotein 1 isoform b       | 9.42  | 3          | 7.61  | 2          | 0.00  | 0          |
| vacuolar protein sorting-associated protein 35  | 9.31  | 3          | 3.00  | 1          | 0.00  | 0          |
| clathrin heavy chain 1 isoform 2                | 22.21 | 6          | 3.96  | 1          | 2.63  | 1          |
| coatamer subunit alpha isoform 1                | 19.80 | 6          | 0.00  | 0          | 0.00  | 0          |
| synaptic vesicle membrane protein VAT-1 homolog | 46.64 | 9          | 53.92 | 13         | 30.06 | 6          |

114

| Nuclear/Transcription-Associated                            |       |            |       |            |       |            |
|-------------------------------------------------------------|-------|------------|-------|------------|-------|------------|
| Protein                                                     | V2CH  |            | V2CL  |            | 293T  |            |
|                                                             | Score | # Peptides | Score | # Peptides | Score | # Peptides |
| lamin isoform A                                             | 24.57 | 6          | 26.79 | 5          | 0.00  | 0          |
| lamin isoform D                                             | 17.55 | 4          | 15.54 | 4          | 0.00  | 0          |
| nucleolin                                                   | 56.62 | 13         | 87.51 | 16         | 23.44 | 5          |
| staphylococcal nuclease domain-containing protein 1         | 31.86 | 9          | 30.90 | 9          | 5.56  | 2          |
| histone H1.1                                                | 16.68 | 3          | 30.34 | 4          | 0.00  | 0          |
| histone H1.3                                                | 37.96 | 8          | 51.21 | 9          | 0.00  | 0          |
| histone H1.4                                                | 37.96 | 8          | 51.21 | 9          | 0.00  | 0          |
| histone H4                                                  | 15.05 | 4          | 17.04 | 5          | 0.00  | 0          |
| histone deacetylase 1                                       | 9.69  | 2          | 7.08  | 2          | 0.00  | 0          |
| histone-binding protein RBBP7 isoform 2                     | 5.38  | 3          | 2.50  | 1          | 0.00  | 0          |
| DNA replication licensing factor MCM2                       | 14.81 | 5          | 8.75  | 3          | 2.61  | 1          |
| FACT complex subunit SSRP1                                  | 15.51 | 4          | 11.21 | 4          | 0.00  | 0          |
| transcription elongation factor SPT6                        | 7.72  | 4          | 0.00  | 0          | 0.00  | 0          |
| protein arginine N-methyltransferase 1 isoform 3            | 15.99 | 3          | 10.38 | 3          | 0.00  | 0          |
| non-POU domain-containing octamer-binding protein isoform 1 | 15.91 | 3          | 3.62  | 1          | 0.00  | 0          |
| Y-box-binding protein 3 isoform b                           | 15.76 | 3          | 23.51 | 3          | 0.00  | 0          |
| replication protein A70 kDa DNA-binding subunit             | 9.50  | 3          | 4.96  | 2          | 2.37  | 1          |



| Cell Death/Proteasome                            |       |            |       |            |       |            |
|--------------------------------------------------|-------|------------|-------|------------|-------|------------|
| Protein                                          | V2CH  |            | V2CL  |            | 293T  |            |
|                                                  | Score | # Peptides | Score | # Peptides | Score | # Peptides |
| programmed cell death protein 6 isoform 2        | 0.00  | 0          | 5.49  | 2          | 0.00  | 0          |
| proteasome activator complex subunit 3 isoform 1 | 32.87 | 6          | 11.69 | 2          | 0.00  | 0          |
| nuclear protein localization protein 4 homolog   | 5.92  | 2          | 0.00  | 0          | 0.00  | 0          |

115

| Protein Transport                 |       |            |       |            |       |            |
|-----------------------------------|-------|------------|-------|------------|-------|------------|
| Protein                           | V2CH  |            | V2CL  |            | 293T  |            |
|                                   | Score | # Peptides | Score | # Peptides | Score | # Peptides |
| importin-7                        | 5.63  | 2          | 0.00  | 0          | 0.00  | 0          |
| importin subunit beta-1 isoform 1 | 11.96 | 4          | 8.75  | 3          | 0.00  | 0          |
| importin subunit beta-1 isoform 2 | 6.66  | 2          | 6.20  | 2          | 0.00  | 0          |
| PREDICTED: importin-5 isoform X1  | 9.40  | 3          | 7.06  | 2          | 0.00  | 0          |

116

| RNA Binding                                               |       |            |       |            |       |            |
|-----------------------------------------------------------|-------|------------|-------|------------|-------|------------|
| Protein                                                   | V2CH  |            | V2CL  |            | 293T  |            |
|                                                           | Score | # Peptides | Score | # Peptides | Score | # Peptides |
| heterogeneous nuclear ribonucleoprotein A1 isoform a      | 17.92 | 5          | 5.60  | 2          | 2.66  | 1          |
| heterogeneous nuclear ribonucleoprotein A1-like 2         | 14.96 | 4          | 5.60  | 2          | 0.00  | 0          |
| heterogeneous nuclear ribonucleoproteins A2/B1 isoform A2 | 22.99 | 5          | 2.82  | 1          | 0.00  | 0          |
| heterogeneous nuclear ribonucleoprotein A/B isoform a     | 20.02 | 5          | 11.88 | 4          | 0.00  | 0          |
| heterogeneous nuclear ribonucleoprotein A3                | 14.17 | 4          | 13.95 | 3          | 0.00  | 0          |
| heterogeneous nuclear ribonucleoprotein D0 isoform d      | 16.30 | 4          | 24.02 | 7          | 0.00  | 0          |
| heterogeneous nuclear ribonucleoprotein R isoform 3       | 13.20 | 5          | 10.14 | 4          | 0.00  | 0          |
| heterogeneous nuclear ribonucleoprotein K isoform b       | 21.46 | 4          | 8.10  | 2          | 0.00  | 0          |
| heterogeneous nuclear ribonucleoprotein L isoform a       | 13.82 | 4          | 0.00  | 0          | 0.00  | 0          |
| heterogeneous nuclear ribonucleoprotein Q isoform 2       | 4.59  | 2          | 4.97  | 2          | 0.00  | 0          |
| polyadenylate-binding protein 3                           | 15.00 | 4          | 15.19 | 4          | 4.24  | 1          |
| polyadenylate-binding protein 4 isoform 1                 | 14.08 | 4          | 13.14 | 4          | 0.00  | 0          |
| poly(rC)-binding protein 2 isoform e                      | 9.41  | 4          | 2.59  | 1          | 0.00  | 0          |
| probable ATP-dependent RNA helicase DDX17 isoform 3       | 13.80 | 4          | 3.18  | 1          | 0.00  | 0          |
| probable ATP-dependent RNA helicase DDX6                  | 11.49 | 4          | 2.87  | 2          | 0.00  | 0          |
| ATP-dependent RNA helicase A                              | 34.07 | 11         | 39.89 | 12         | 7.30  | 2          |
| ELAV-like protein 1                                       | 15.12 | 3          | 3.17  | 1          | 0.00  | 0          |

117

| RNA Splicing                                              |       |            |       |            |       |            |
|-----------------------------------------------------------|-------|------------|-------|------------|-------|------------|
| Protein                                                   | V2CH  |            | V2CL  |            | 293T  |            |
|                                                           | Score | # Peptides | Score | # Peptides | Score | # Peptides |
| splicing factor 3B subunit 3                              | 5.02  | 3          | 6.92  | 2          | 0.00  | 0          |
| cleavage and polyadenylation specificity factor subunit 5 | 10.28 | 2          | 8.99  | 3          | 0.00  | 0          |
| nuclease-sensitive element-binding protein 1              | 15.76 | 3          | 23.51 | 3          | 0.00  | 0          |
| small nuclear ribonucleoprotein Sm D1 isoform 1           | 22.26 | 5          | 22.05 | 5          | 3.80  | 1          |
| spliceosome RNA helicase DDX39B                           | 14.86 | 5          | 7.77  | 3          | 0.00  | 0          |
| U5 small nuclear ribonucleoprotein 200 kDa helicase       | 22.17 | 7          | 3.20  | 1          | 0.00  | 0          |

118

| Other                                                                               |        |            |        |            |        |            |
|-------------------------------------------------------------------------------------|--------|------------|--------|------------|--------|------------|
| Protein                                                                             | V2CH   |            | V2CL   |            | 293T   |            |
|                                                                                     | Score  | # Peptides | Score  | # Peptides | Score  | # Peptides |
| Golgi apparatus protein 1 isoform 2 precursor                                       | 31.55  | 9          | 52.66  | 11         | 5.31   | 2          |
| ubiquitin-like modifier-activating enzyme 1                                         | 25.94  | 5          | 19.65  | 7          | 3.14   | 1          |
| voltage-gated potassium channel subunit beta-2 isoform 2                            | 12.38  | 3          | 11.54  | 3          | 0.00   | 0          |
| T-complex protein 1 subunit epsilon                                                 | 16.68  | 4          | 20.81  | 8          | 3.19   | 1          |
| T-complex protein 1 subunit eta isoform c                                           | 11.69  | 4          | 15.67  | 4          | 0.00   | 0          |
| catalase                                                                            | 6.30   | 2          | 0.00   | 0          | 0.00   | 0          |
| peroxidasin homolog precursor                                                       | 109.14 | 23         | 196.17 | 32         | 102.00 | 22         |
| ATP-citrate synthase isoform 3                                                      | 102.29 | 26         | 87.61  | 23         | 33.67  | 9          |
| nucleoside diphosphate kinase A isoform b                                           | 28.84  | 6          | 37.20  | 8          | 7.65   | 2          |
| metalloproteinase inhibitor 2 precursor                                             | 8.57   | 2          | 28.39  | 6          | 5.02   | 1          |
| ras GTPase-activating-like protein IQGAP1                                           | 37.52  | 9          | 22.55  | 7          | 4.28   | 1          |
| interleukin enhancer-binding factor 2 isoform 1                                     | 33.26  | 6          | 14.61  | 5          | 0.00   | 0          |
| interleukin enhancer-binding factor 3 isoform c                                     | 19.25  | 5          | 14.92  | 3          | 0.00   | 0          |
| proliferation-associated protein 2G4                                                | 6.19   | 2          | 5.57   | 2          | 0.00   | 0          |
| <b>vascular endothelial growth factor A isoform a</b>                               | 6.89   | 3          | 2.35   | 1          | 5.50   | 2          |
| <b>latent-transforming growth factor beta-binding protein 1 isoform 3 precursor</b> | 7.54   | 2          | 0.00   | 0          | 7.63   | 2          |
| <b>transforming growth factor beta-1 precursor</b>                                  | 2.65   | 1          | 6.18   | 2          | 2.49   | 1          |
| <b>insulin-like growth factor-binding protein 4 precursor</b>                       | 8.22   | 1          | 9.12   | 2          | 0.00   | 0          |
| <b>insulin-like growth factor II isoform 2</b>                                      | 4.14   | 1          | 3.77   | 1          | 0.00   | 0          |

119
